# Supplementary material for: Prediction of blood-based biomarkers and subsequent design of bisulfite PCR-LDR-qPCR assay for breast cancer detection
Source: Springer Nature journal article supplement (doi:10.1186/s12885-020-6574-4), 2020-01-31
Supplement: MOESM1 [file 17614256]

## Supplementary Files

**Supplement 1 (Table).** The cohorts analyzed for biomarker discovery. Legends: PT (primary tumors), SN (solid normal), PB (peripheral blood), Met (metastasis), Imm (immune cells).

| Cohort ID | Source | Cohort Description                                               | Sample Count    | Average Age                          | Primary Tumor Stage Distribution                                                                                                            |
|-----------|--------|------------------------------------------------------------------|-----------------|--------------------------------------|---------------------------------------------------------------------------------------------------------------------------------------------|
| ACC       | TCGA   | adrenocortical carcinoma                                         | PT(80)          | PT(46.4 ± 15.89)                     | I(9), II(36), III(16), IV(16)                                                                                                               |
| BLCA      | TCGA   | bladder urothelial carcinoma                                     | PT(412), SN(21) | PT(69.89 ± 12.56)                    | I(3), II(114), III(120), IV(118)                                                                                                            |
| BRCA      | TCGA   | breast invasive carcinoma                                        | PT(668), SN(98) | PT(57.77 ± 13.09); SN(57.42 ± 15.19) | I(50), IA(54), IB(5), II(8), IIA(205), IIB(148), III(2), IIIA(106), IIIB(17), IIIC(41), IV(6), X(5)                                         |
| CESC      | TCGA   | cervical squamous cell carcinoma and endocervical adenocarcinoma | PT(307)         | PT(48.23 ± 13.8)                     | I(5), IA(1), IA1(1), IA2(1), IB(37), IB1(77), IB2(38), II(5), IIA(9), IIA1(5), IIA2(7), IIB(43), III(1), IIIA(3), IIIB(42), IVA(9), IVB(12) |
| CHOL      | TCGA   | cholangiocarcinoma                                               | PT(36), SN(9)   | PT(63.34 ± 12.9); SN(70.56 ± 9.15)   | I(19), II(9), III(1), IV(1), IVA(2), IVB(3)                                                                                                 |
| COAD      | TCGA   | colon adenocarcinoma                                             | PT(240), SN(38) | PT(65 ± 13.19); SN(69.37 ± 12.44)    | I(43), IA(1), II(14), IIA(92), IIB(5), IIC(1), III(7), IIIA(9), IIIB(45), IIIC(23), IV(21), IVA(17), IVB(2)                                 |
| DLBC      | TCGA   | lymphoid neoplasm diffuse large b-cell lymphoma                  | PT(48)          | PT(56.17 ± 14.23)                    | I(8), II(17), III(4), IV(12)                                                                                                                |
| ESCA      | TCGA   | esophageal carcinoma                                             | PT(185), SN(16) | PT(62.62 ± 12.16); SN(67.69 ± 10.98) | 0(1), I(8), IA(5), IB(7), II(1), IIA(39), IIB(29), III(26), IIIA(12), IIIB(10), IIIC(7), IV(4), IVA(3)                                      |
| GBM       | TCGA   | glioblastoma multiforme                                          | PT(140)         | PT(59.75 ± 12.83)                    | NA                                                                                                                                          |
| GSE42861  | GEO    | peripheral blood control                                         | PB(689)         | SN(51.92 ± 11.79)                    | NA                                                                                                                                          |

| Cohort ID | Source | Cohort Description                    | Sample Count         | Average Age                          | Primary Tumor Stage Distribution                                                |
|-----------|--------|---------------------------------------|----------------------|--------------------------------------|---------------------------------------------------------------------------------|
| GSE46306  | GEO    | cervical tissue                       | SN(20)               | NA                                   | NA                                                                              |
| GSE51954  | GEO    | human dermis and epidermis            | SN(79)               | SN(50.25 ± 25.2)                     | NA                                                                              |
| GSE59250  | GEO    | various immune cells                  | Imm(206)             | NA                                   | NA                                                                              |
| GSE64509  | GEO    | human brain tissues                   | SN(260)              | SN(71.2 ± 27.35)                     | NA                                                                              |
| GSE65820  | GEO    | ovarian cancer                        | PT(79), SN(6)        | NA                                   | NA                                                                              |
| GSE74104  | GEO    | testicular germ cell tumors           | PT(139), SN(128)     | NA                                   | NA                                                                              |
| GSE77871  | GEO    | adrenocortical cancer                 | PT(18), SN(6)        | NA                                   | NA                                                                              |
| GSE99553  | GEO    | gastric cancer                        | PT(42), SN(42)       | NA                                   | NA                                                                              |
| HNSC      | TCGA   | head and neck squamous cell carcinoma | PT(528), SN(50)      | PT(60.93 ± 11.97); SN(62.06 ± 10.63) | I(27), II(78), III(75), IVA(253), IVB(12), IVC(1)                               |
| KICH      | TCGA   | kidney chromophobe carcinoma          | PT(66)               | PT(51.52 ± 14.3)                     | I(21), II(25), III(14), IV(6)                                                   |
| KIRC      | TCGA   | kidney renal clear cell carcinoma     | PT(319), SN(160)     | PT(61.52 ± 11.85); SN(63.13 ± 11.45) | I(152), II(31), III(75), IV(56)                                                 |
| KIRP      | TCGA   | kidney renal papillary cell carcinoma | PT(275), SN(45)      | PT(61.36 ± 12.27); SN(63.78 ± 12.61) | I(163), II(18), III(48), IV(13)                                                 |
| LAML      | TCGA   | AML_PB                                | Primary cancer (194) | PT(55.11 ± 16.02)                    | NA                                                                              |
| LGG       | TCGA   | lower grade glioma                    | PT(516)              | PT(43.05 ± 13.51)                    | NA                                                                              |
| LIHC      | TCGA   | liver hepatocellular carcinoma        | PT(377), SN(50)      | PT(59.81 ± 13.11); SN(62.34 ± 15.98) | I(168), II(83), III(3), IIIA(62), IIIB(8), IIIC(9), IV(3), IVA(1), IVB(2)       |
| LUAD      | TCGA   | lung adenocarcinoma                   | PT(450), SN(32)      | PT(65.11 ± 10.16); SN(64.56 ± 11.56) | I(6), IA(118), IB(125), II(1), IIA(47), IIB(64), IIIA(64), IIIB(9), IV(21)      |
| LUSC      | TCGA   | lung squamous cell carcinoma          | PT(372), SN(43)      | PT(67.71 ± 8.65); SN(68.62 ± 10.02)  | I(4), IA(69), IB(98), II(2), IIA(58), IIB(67), III(3), IIIA(46), IIIB(7), IV(4) |
| MESO      | TCGA   | mesothelioma                          | PT(87)               | PT(62.89 ± 9.55)                     | I(6), IA(2), IB(1), II(15), III(39), IV(10)                                     |
| PAAD      | TCGA   | pancreatic adenocarcinoma             | PT(184), SN(10)      | PT(64.91 ± 11.16); SN(70.38 ± 13.44) | I(1), IA(6), IB(13), IIA(26), IIB(114), III(5), IV(4)                           |

| Cohort ID | Source | Cohort Description                    | Sample Count      | Average Age                          | Primary Tumor Stage Distribution                                                                                                           |
|-----------|--------|---------------------------------------|-------------------|--------------------------------------|--------------------------------------------------------------------------------------------------------------------------------------------|
| PCPG      | TCGA   | Pheochromocytoma and paraganglioma_PT | PT(179)           | PT(47.33 ± 15.12)                    | NA                                                                                                                                         |
| PRAD      | TCGA   | prostate adenocarcinoma               | PT(192), SN(49)   | PT(60.87 ± 6.87); SN(61.88 ± 6.53)   | NA                                                                                                                                         |
| READ      | TCGA   | rectum adenocarcinoma                 | PT(91)            | PT(62.94 ± 12.29); SN(66.57 ± 12.73) | I(11), II(6), IIA(20), IIB(2), IIC(2), III(4), IIIA(9), IIIB(13), IIIC(11), IV(6), IVA(9)                                                  |
| SARC      | TCGA   | sarcoma                               | PT(261)           | PT(61.19 ± 14.41)                    | NA                                                                                                                                         |
| SKCM      | TCGA   | skin cutaneous melanoma               | Met(368), PT(105) | PT(63.39 ± 14.2); Met(55.80 ± 15.74) | IB(1), II(1), IIA(3), IIB(7), IIC(41), III(1), IIIA(1), IIIB(11), IIIC(12), IV(3), Mets(325)                                               |
| STAD      | TCGA   | stomach adenocarcinoma                | PT(260)           | PT(65.22 ± 10.6)                     | I(3), IA(13), IB(36), II(28), IIA(39), IIB(54), III(3), IIIA(78), IIIB(60), IIIC(40), IV(34)                                               |
| TGCT      | TCGA   | testicular germ cell tumors           | PT(150)           | PT(32.08 ± 9.37)                     | I(18), IA(24), IB(11), II(5), IIA(6), IIB(1), IIC(1), III(2), IIIA(1), IIIB(6), IIIC(5), IS(46)                                            |
| THCA      | TCGA   | thyroid carcinoma                     | PT(500), SN(56)   | PT(47.07 ± 15.56); SN(45.66 ± 16.87) | THCA, I(272), II(51), III(108), IV(2), IVA(41), IVC(5)                                                                                     |
| THYM      | TCGA   | Thymus_PT                             | PT(124)           | PT(58.65 ± 12.61)                    | NA                                                                                                                                         |
| UCEC      | TCGA   | uterine corpus endometrial carcinoma  | PT(431), SN(46)   | PT(64.22 ± 11.26); SN(60.97 ± 11.32) | I(2), IA(119), IB(114), IC(20), II(27), IIA(4), IIB(11), III(2), IIIA(35), IIIB(5), IIIC(24), IIIC1(16), IIIC2(16), IV(4), IVA(2), IVB(18) |
| UCS       | TCGA   | uterine carcinosarcoma                | PT(57)            | PT(69.74 ± 9.3)                      | IA(12), IB(8), IC(2), II(3), IIA(1), IIB(1), III(2), IIIA(2), IIIB(2), IIIC(4), IIIC1(4), IIIC2(6), IV(1), IVB(9)                          |

| <b>Cohort ID</b> | <b>Source</b> | <b>Cohort Description</b> | <b>Sample Count</b> | <b>Average Age</b> | <b>Primary Tumor Stage Distribution</b>              |
|------------------|---------------|---------------------------|---------------------|--------------------|------------------------------------------------------|
| UVM              | TCGA          | uveal melanoma            | PT(80)              | PT(61.77 ± 14.03)  | IIA(12), IIB(27), IIIA(24), IIIB(10), IIIC(1), IV(4) |

**Supplement 2 (Table).** List of primers used for the multiplex PCR-LDR-qPCR assay. Note that: /5SpC3/ - 5' C3 Spacer, /3SpC3/ - 3' C3 Spacer, /5Phos/ - 5' Phosphate, /56-FAM/ - 5' Fam Fluorescent Dye, /5HEX/ - HEX<sup>TM</sup> Fluorescent Dye, /ZEN/ - ZEN<sup>TM</sup> Fluorescent Quencher <sup>TM</sup>, /3IABkFQ/ - 3' Iowa Black <sup>®</sup> Fluorescent Quencher, green to pink spectral range, “+” - Locked Nucleic Acid base, “rA” - ribonucleotide base riboadenosine; “rT” - ribonucleotide base ribothymidine; “rG” - ribonucleotide base riboguanosine; “rC” - ribonucleotide base ribocytosine.

| Primer ID                | Purpose | Sequence                                                                      |
|--------------------------|---------|-------------------------------------------------------------------------------|
| <b>A. m_NR5A2</b>        |         |                                                                               |
| AcDx-5141-NR5A2-S1-FP    | PCR     | ATGTGCGGGTCGGCrGGGTC/3SpC3/                                                   |
| AcDx-5142-NR5A2-S1-RP    | PCR     | GGTGTCGTGGTCTACTCTCAACACCTCCCAArUCCTC/3SpC3/                                  |
| AcDx-5143-NR5A2-S1-Up    | LDR     | TCATCGCCCTCAGATCTTCCAGGTCGGCGGGTTTGTGATCTCrG<br>GAGT/3SpC3/                   |
| AcDx-5144-NR5A2-S1-Dn    | LDR     | /5Phos/GGAACGTTTTTTTGTATTTTTTTTGCGCGAATTTGAAAGTG<br>GAGGATAGATTGGAGGGCA       |
| AcDx-5145-NR5A2-S1-RT-Pb | qPCR    | /56-<br>FAM/AATGATCTC/ZEN/GGAACGTTTTTTTGTATTTTTTTTGCG/3IA<br>BkFQ/            |
| AcDx-5146-NR5A2-S1-RT-FP | qPCR    | TCATCGCCCTCAGATCTTCCA                                                         |
| AcDx-5147-NR5A2-S1-RT-RP | qPCR    | TGCCCTCCAATCTATCCTCCA                                                         |
| <b>B. m_PRKCB</b>        |         |                                                                               |
| AcDx-5151-PRKCB-S1-FP    | PCR     | TTAAGCGTAGTTGGACGAGCrGGTAA/3SpC3/                                             |
| AcDx-5152-PRKCB-S1-RP    | PCR     | GGTGTCGTGGTCCCCTACGCCGACTCrUAAACA/3SpC3/                                      |
| AcDx-5153-PRKCB-S1-Up    | LDR     | TTCGCCTACCGCAGTGAACACGAGCGGTAGTAGTTGAGCrGAG<br>CA/3SpC3/                      |
| AcDx-5154-PRKCB-S1-Dn    | LDR     | /5Phos/GAGTGATAGTTTCGGTTTCGCGCGTCGGTTGAGACATGG<br>GCTCGCA                     |
| AcDx-5155-PRKCB-S1-RT-Pb | qPCR    | /56-<br>FAM/ATGTTGAGC/ZEN/GAGTGATAGTTTCGGTTTCGC/3IABkFQ/                      |
| AcDx-5156-PRKCB-S1-RT-FP | qPCR    | TTCGCCTACCGCAGTGAAC                                                           |
| AcDx-5157-PRKCB-S1-RT-RP | qPCR    | TGCGAGCCCATGTCTCAAC                                                           |
| <b>C. m_ncr1</b>         |         |                                                                               |
| AcDx-5161-NCR1-S1-FP     | PCR     | TTTAAATTTAGGTTTCGTTTAGTTATAGGCrGTTTT/3SpC3/                                   |
| AcDx-5162-NCR1-S1-RP     | PCR     | GGTGTCGTGGACGCGCCCCGAAACrUAAAC/3SpC3/                                         |
| AcDx-5163-NCR1-S1-Up     | LDR     | TGGATCGAGACGGAATGCAACGTTTCGTTTAGTTATAGGCGTTT<br>AGGTTTAATCrGGTCC/3SpC3/       |
| AcDx-5164-NCR1-S1-Dn     | LDR     | /5Phos/GGTTTTTTTTTATATAATTTTTTTTTATAGTATGCGGGGCG<br>GGTTCCCTGATTGATACCCGCA    |
| AcDx-5165-NCR1-S1-RT-Pb  | qPCR    | /56-<br>FAM/CATTTAATC/ZEN/GGTTTTTTTTTATATAATTTTTTTTTATAGT<br>ATGCGCG/3IABkFQ/ |
| AcDx-5166-NCR1-S1-RT-FP  | qPCR    | TGGATCGAGACGGAATGCAAC                                                         |
| AcDx-5167-NCR1-S1-RT-RP  | qPCR    | TGCGGGTATCAATCAGGGAAAC                                                        |

| <b>D. m_GRK7</b>        |      |                                                                   |
|-------------------------|------|-------------------------------------------------------------------|
| AcDx-5221-GRK7-S1-FP    | PCR  | GGGTTTAgGGTCGTATTTTTTCrGAGGC/3SpC3/                               |
| AcDx-5222-GRK7-S1-RP    | PCR  | GGTGTCGTGGTCTCCTTCCTTCCTCCGAaAAAAG/3SpC3/                         |
| AcDx-5223-GRK7-S1-Up    | LDR  | TTCGTGCGTCGTGTAGCAATCGAGGTTTGTAAGGTTATTGTT<br>AAAAGCrGTAAG/3SpC3/ |
| AcDx-5224-GRK7-S1-Dn    | LDR  | /5Phos/GTAGAGGAGTAGTTGGGAACGAGAATAAAGCGGTTGCC<br>CATTTCTGCACCCA   |
| AcDx-5225-GRK7-S1-RT-Pb | qPCR | /56-<br>FAM/AATAAAAAGC/ZEN/GTAGAGGAGTAGTTGGGAACGA/3IABk<br>FQ/    |
| AcDx-5226-GRK7-S1-RT-FP | qPCR | TTCGTGCGTCGTGTAGCAA                                               |
| AcDx-5227-GRK7-S1-RT-RP | qPCR | TGGGTGCAGAAAATGGGCAA                                              |

**Supplement 3 (Table).** Genomic information for the breast cancer-specific CpG sites interrogated in the multiplex PCR, LDR, qPCR assay described in this report.

| <b>CpG Marker ID</b> | <b>CpG ID</b>  | <b>CpG_Coord(37)</b>          | <b>Name</b> | <b>Relation_to_UCSC_CpG_Island</b> | <b>Enhancer</b> |
|----------------------|----------------|-------------------------------|-------------|------------------------------------|-----------------|
| m_NR5A2              | cg040976<br>39 | Chr1:_200009830_20000<br>9831 | NR5A2       | Island                             |                 |
| m_PRKCB              | cg033063<br>74 | Chr16:_23847325_23847<br>326  | PRKCB       | Island                             |                 |
| m_ncr1               | cg161715<br>26 | Chr1:_155043744_15504<br>3745 |             | Island                             | TRUE            |

**Supplement 4 (Tables). A.** Statistical summary of the  $\beta$  values (methylation level) for 3 CpG markers across major types of cancer.  $\beta$  value ranges from 0 (unmethylated) to 1 (completely methylated). PT = primary tumor; SN= solid normal. **B-D.** Statistical comparison (for each of the marker) between each subgroup.

**A. Statistical Summaries for each marker in 7 major cancer types**

| Cohort   | #PT | #SN | m_ncr1 |        |       |        | m_NR5A2 |        |       |        | m_PRKCB |        |       |        |
|----------|-----|-----|--------|--------|-------|--------|---------|--------|-------|--------|---------|--------|-------|--------|
|          |     |     | PT     |        | SN    |        | PT      |        | SN    |        | PT      |        | SN    |        |
|          |     |     | Mean   | St Dev | Mean  | St Dev | Mean    | St Dev | Mean  | St Dev | Mean    | St Dev | Mean  | St Dev |
| BRCA     | 668 | 98  | 0.536  | 0.76   | 0.206 | 0.644  | 0.604   | 0.749  | 0.156 | 0.618  | 0.561   | 0.784  | 0.091 | 0.635  |
| OV       | 79  | 6   | 0.048  | 0.511  | 0.05  | 0.521  | 0.163   | 0.671  | 0.224 | 0.634  | 0.065   | 0.63   | 0.062 | 0.552  |
| UCEC     | 431 | 46  | 0.093  | 0.678  | 0.035 | 0.533  | 0.158   | 0.733  | 0.101 | 0.577  | 0.328   | 0.843  | 0.06  | 0.561  |
| COADREAD | 395 | 45  | 0.03   | 0.549  | 0.028 | 0.518  | 0.163   | 0.746  | 0.046 | 0.514  | 0.362   | 0.826  | 0.023 | 0.509  |
| LUAD     | 458 | 32  | 0.071  | 0.571  | 0.066 | 0.522  | 0.454   | 0.738  | 0.106 | 0.526  | 0.446   | 0.757  | 0.054 | 0.53   |
| LUSC     | 372 | 43  | 0.054  | 0.603  | 0.031 | 0.511  | 0.436   | 0.78   | 0.055 | 0.52   | 0.112   | 0.709  | 0.019 | 0.507  |
| PAAD     | 184 | 10  | 0.029  | 0.519  | 0.03  | 0.51   | 0.139   | 0.699  | 0.026 | 0.51   | 0.498   | 0.719  | 0.076 | 0.659  |

**B. m\_ncr1 methylation level statistical comparison (t test) between each subgroup**

| Two subgroups compared |             | Difference | Std Err Dif | Lower CL | Upper CL  | p-Value |
|------------------------|-------------|------------|-------------|----------|-----------|---------|
| BRCA_PT                | BRCA_SN     | 0.3299201  | 0.016722    | 0.297132 | 0.3627087 | <.0001  |
| BRCA_PT                | OV_PT       | 0.4884582  | 0.0183923   | 0.452395 | 0.5245216 | <.0001  |
| BRCA_PT                | OV_SN       | 0.486162   | 0.0633932   | 0.361861 | 0.610463  | <.0001  |
| BRCA_PT                | UCEC_PT     | 0.4434017  | 0.009551    | 0.424674 | 0.4621293 | <.0001  |
| BRCA_PT                | UCEC_SN     | 0.5008598  | 0.0235645   | 0.454655 | 0.547065  | <.0001  |
| BRCA_PT                | COADREAD_PT | 0.5060908  | 0.009812    | 0.486852 | 0.5253301 | <.0001  |
| BRCA_PT                | COADREAD_SN | 0.5077486  | 0.0238082   | 0.461066 | 0.5544317 | <.0001  |
| BRCA_PT                | LUAD_PT     | 0.4650661  | 0.0093783   | 0.446677 | 0.4834551 | <.0001  |
| BRCA_PT                | LUAD_SN     | 0.4699401  | 0.0279745   | 0.415088 | 0.5247924 | <.0001  |
| BRCA_PT                | LUSC_PT     | 0.4817958  | 0.0100008   | 0.462186 | 0.5014053 | <.0001  |
| BRCA_PT                | LUSC_SN     | 0.504662   | 0.0243214   | 0.456973 | 0.5523513 | <.0001  |
| BRCA_PT                | PAAD_PT     | 0.5071473  | 0.0128706   | 0.481911 | 0.5323839 | <.0001  |
| BRCA_PT                | PAAD_SN     | 0.505772   | 0.0492496   | 0.409204 | 0.6023404 | <.0001  |

**C. m\_NR5A2 methylation level statistical comparison (t test) between each subgroup**

| Two subgroups compared |         | Difference | Std Err Dif | Lower CL | Upper CL | p-Value |
|------------------------|---------|------------|-------------|----------|----------|---------|
| BRCA_PT                | BRCA_SN | 0.4489162  | 0.025206    | 0.399492 | 0.49834  | <.0001  |
| BRCA_PT                | OV_PT   | 0.441232   | 0.027724    | 0.386872 | 0.495592 | <.0001  |
| BRCA_PT                | OV_SN   | 0.3805213  | 0.095556    | 0.193156 | 0.567887 | <.0001  |
| BRCA_PT                | UCEC_PT | 0.4467789  | 0.014397    | 0.41855  | 0.475008 | <.0001  |
| BRCA_PT                | UCEC_SN | 0.5035147  | 0.03552     | 0.433867 | 0.573162 | <.0001  |



|                |                    |           |          |          |          |        |
|----------------|--------------------|-----------|----------|----------|----------|--------|
| <b>BRCA_PT</b> | <b>COADREAD_PT</b> | 0.4413061 | 0.01479  | 0.412306 | 0.470306 | <.0001 |
| <b>BRCA_PT</b> | <b>COADREAD_SN</b> | 0.5581535 | 0.035887 | 0.487786 | 0.628521 | <.0001 |
| <b>BRCA_PT</b> | <b>LUAD_PT</b>     | 0.15064   | 0.014136 | 0.122921 | 0.178359 | <.0001 |
| <b>BRCA_PT</b> | <b>LUAD_SN</b>     | 0.4983681 | 0.042167 | 0.415687 | 0.58105  | <.0001 |
| <b>BRCA_PT</b> | <b>LUSC_PT</b>     | 0.1679871 | 0.015075 | 0.138429 | 0.197546 | <.0001 |
| <b>BRCA_PT</b> | <b>LUSC_SN</b>     | 0.5494108 | 0.036661 | 0.477526 | 0.621295 | <.0001 |
| <b>BRCA_PT</b> | <b>PAAD_PT</b>     | 0.4650147 | 0.019401 | 0.426974 | 0.503055 | <.0001 |
| <b>BRCA_PT</b> | <b>PAAD_SN</b>     | 0.5789413 | 0.074237 | 0.433379 | 0.724504 | <.0001 |

**C. m\_PRKCB methylation level statistical comparison (t test) between each subgroup**

| <b>Two subgroups compared</b> |                    | <b>Difference</b> | <b>Std Err Dif</b> | <b>Lower CL</b> | <b>Upper CL</b> | <b>p-Value</b> |
|-------------------------------|--------------------|-------------------|--------------------|-----------------|-----------------|----------------|
| <b>BRCA_PT</b>                | <b>BRCA_SN</b>     | 0.4694573         | 0.029              | 0.412594        | 0.52632         | <.0001         |
| <b>BRCA_PT</b>                | <b>OV_PT</b>       | 0.4955842         | 0.031896           | 0.433042        | 0.558127        | <.0001         |
| <b>BRCA_PT</b>                | <b>OV_SN</b>       | 0.4983015         | 0.109939           | 0.282735        | 0.713869        | <.0001         |
| <b>BRCA_PT</b>                | <b>UCEC_PT</b>     | 0.2328358         | 0.016564           | 0.200358        | 0.265314        | <.0001         |
| <b>BRCA_PT</b>                | <b>UCEC_SN</b>     | 0.5007631         | 0.040866           | 0.420633        | 0.580894        | <.0001         |
| <b>BRCA_PT</b>                | <b>COADREAD_PT</b> | 0.1980836         | 0.017016           | 0.164718        | 0.231449        | <.0001         |
| <b>BRCA_PT</b>                | <b>COADREAD_SN</b> | 0.5377727         | 0.041289           | 0.456813        | 0.618732        | <.0001         |
| <b>BRCA_PT</b>                | <b>LUAD_PT</b>     | 0.1146623         | 0.016264           | 0.082772        | 0.146553        | <.0001         |
| <b>BRCA_PT</b>                | <b>LUAD_SN</b>     | 0.5067911         | 0.048514           | 0.411665        | 0.601918        | <.0001         |
| <b>BRCA_PT</b>                | <b>LUSC_PT</b>     | 0.4484663         | 0.017344           | 0.414459        | 0.482474        | <.0001         |
| <b>BRCA_PT</b>                | <b>LUSC_SN</b>     | 0.5410907         | 0.042179           | 0.458386        | 0.623795        | <.0001         |
| <b>BRCA_PT</b>                | <b>PAAD_PT</b>     | 0.0624903         | 0.022321           | 0.018724        | 0.106257        | 0.0051         |
| <b>BRCA_PT</b>                | <b>PAAD_SN</b>     | 0.4841949         | 0.08541            | 0.316723        | 0.651667        | <.0001         |

**Supplement 5 (Figure and Tables).** Relationship between CpG methylation and Primary Tumor Stage.

**Part A.** Comparative level of methylation ( $\beta$  value) at  $m\_ncr1$ ,  $m\_PRKCB$ , and  $m\_NR5A2$  in normal breast tissues, and each of the 3 primary tumor stages of breast cancer. The  $\beta$  values range from -0.5 (0% methylation) to +0.5 (100% methylation).

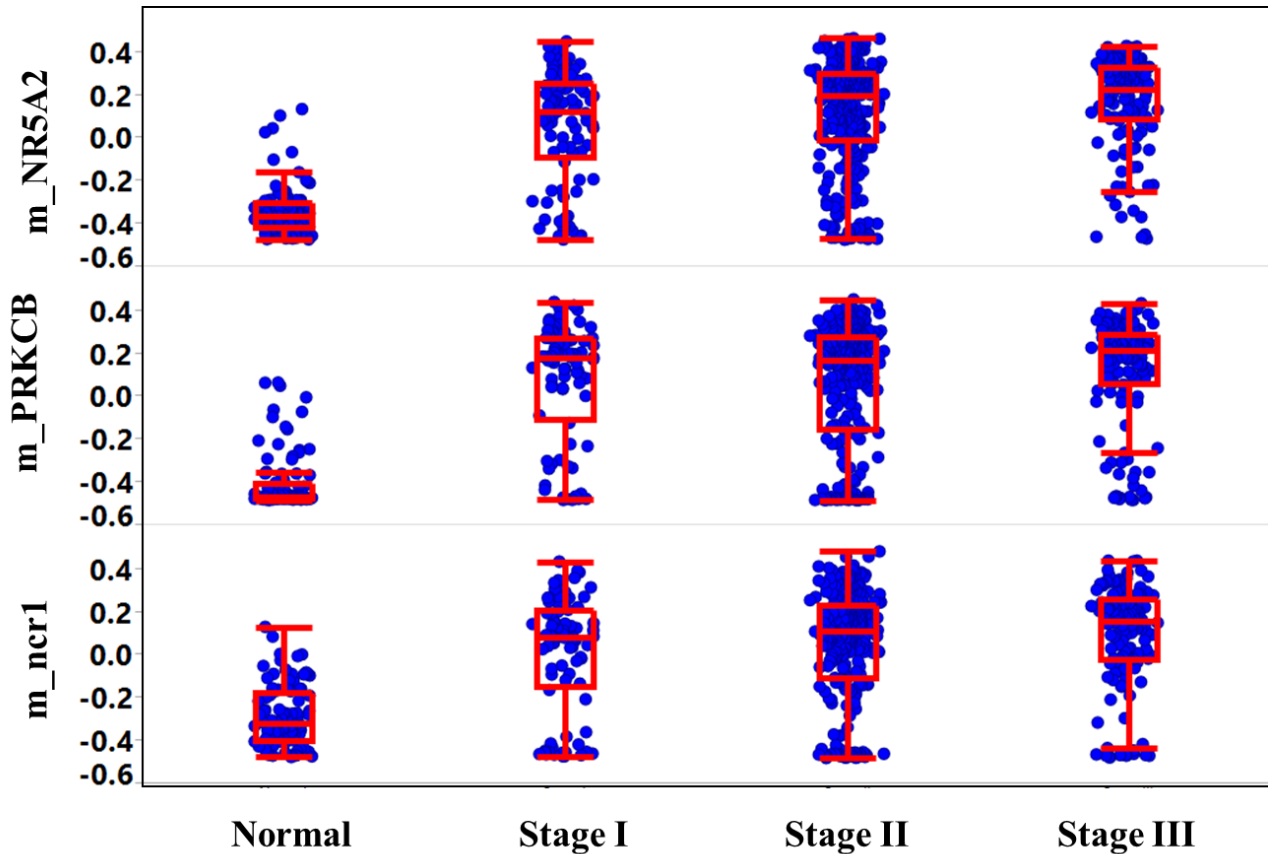

**Part B.** Comparison of means for  $m\_ncr1$

| Level     | Number | Mean     | Std Dev  | Std Err Mean | Lower 95% | Upper 95% |
|-----------|--------|----------|----------|--------------|-----------|-----------|
| Normal    | 96     | -0.29493 | 0.145152 | 0.01481      | -0.3243   | -0.2655   |
| Stage I   | 89     | -0.00072 | 0.274439 | 0.02909      | -0.0585   | 0.0571    |
| Stage II  | 309    | 0.03442  | 0.265761 | 0.01512      | 0.0047    | 0.0642    |
| Stage III | 136    | 0.09018  | 0.237303 | 0.02035      | 0.0499    | 0.1304    |

### Ordered Differences Report

| Level     | - Level  | Difference | Std Err Dif | Lower CL  | Upper CL  | p-Value |
|-----------|----------|------------|-------------|-----------|-----------|---------|
| Stage III | Normal   | 0.3851105  | 0.0328367   | 0.320627  | 0.4495940 | <.0001* |
| Stage II  | Normal   | 0.3293511  | 0.0287828   | 0.272829  | 0.3858737 | <.0001* |
| Stage I   | Normal   | 0.2942176  | 0.0362473   | 0.223037  | 0.3653987 | <.0001* |
| Stage III | Stage I  | 0.0908929  | 0.0335852   | 0.024940  | 0.1568462 | 0.0070* |
| Stage III | Stage II | 0.0557594  | 0.0253485   | 0.005981  | 0.1055378 | 0.0282* |
| Stage II  | Stage I  | 0.0351335  | 0.0296339   | -0.023060 | 0.0933273 | 0.2362  |

### Part C. Comparison of means for m\_NR5A2

| Level     | Number | Mean     | Std Dev  | Std Err Mean | Lower 95% | Upper 95% |
|-----------|--------|----------|----------|--------------|-----------|-----------|
| Normal    | 96     | -0.34368 | 0.119312 | 0.01218      | -0.3679   | -0.3195   |
| Stage I   | 89     | 0.05237  | 0.264735 | 0.02806      | -0.0034   | 0.1081    |
| Stage II  | 309    | 0.11018  | 0.251557 | 0.01431      | 0.0820    | 0.1383    |
| Stage III | 136    | 0.16222  | 0.218533 | 0.01874      | 0.1252    | 0.1993    |

### Ordered Differences Report

| Level     | - Level  | Difference | Std Err Dif | Lower CL  | Upper CL  | p-Value |
|-----------|----------|------------|-------------|-----------|-----------|---------|
| Stage III | Normal   | 0.5059030  | 0.0308175   | 0.4453847 | 0.5664213 | <.0001* |
| Stage II  | Normal   | 0.4538647  | 0.0270129   | 0.4008177 | 0.5069116 | <.0001* |
| Stage I   | Normal   | 0.3960532  | 0.0340184   | 0.3292492 | 0.4628573 | <.0001* |
| Stage III | Stage I  | 0.1098498  | 0.0315200   | 0.0479521 | 0.1717474 | 0.0005* |
| Stage II  | Stage I  | 0.0578114  | 0.0278116   | 0.0031961 | 0.1124268 | 0.0381* |
| Stage III | Stage II | 0.0520383  | 0.0237898   | 0.0053209 | 0.0987558 | 0.0291* |

### Part D. Comparison of means for m\_PRKCB

| Level     | Number | Mean     | Std Dev  | Std Err Mean | Lower 95% | Upper 95% |
|-----------|--------|----------|----------|--------------|-----------|-----------|
| Normal    | 96     | -0.40747 | 0.136051 | 0.01389      | -0.4350   | -0.3799   |
| Stage I   | 89     | 0.06242  | 0.284425 | 0.03015      | 0.0025    | 0.1223    |
| Stage II  | 309    | 0.04843  | 0.298065 | 0.01696      | 0.0151    | 0.0818    |
| Stage III | 136    | 0.11100  | 0.253564 | 0.02174      | 0.0680    | 0.1540    |

### Ordered Differences Report

| Level     | - Level  | Difference | Std Err Dif | Lower CL  | Upper CL  | p-Value |
|-----------|----------|------------|-------------|-----------|-----------|---------|
| Stage III | Normal   | 0.5184703  | 0.0357088   | 0.448347  | 0.5885938 | <.0001* |
| Stage I   | Normal   | 0.4698953  | 0.0394177   | 0.392488  | 0.5473023 | <.0001* |
| Stage II  | Normal   | 0.4559008  | 0.0313003   | 0.394434  | 0.5173672 | <.0001* |
| Stage III | Stage II | 0.0625695  | 0.0275656   | 0.008437  | 0.1167017 | 0.0236* |
| Stage III | Stage I  | 0.0485750  | 0.0365227   | -0.023147 | 0.1202968 | 0.1840  |
| Stage I   | Stage II | 0.0139945  | 0.0322258   | -0.049289 | 0.0772782 | 0.6642  |

**Supplement 6 (Figures and Tables).** Relationship between CpG methylation and molecular subtypes of breast cancer.

**A.** Comparative level of methylation ( $\beta$  value) at *m\_ncr1*, *m\_PRKCB*, and *m\_NR5A2* in normal breast tissues, and each of the 4 molecular subtypes of breast cancer. The  $\beta$  values range from -0.5 (0% methylation) to +0.5 (100% methylation).

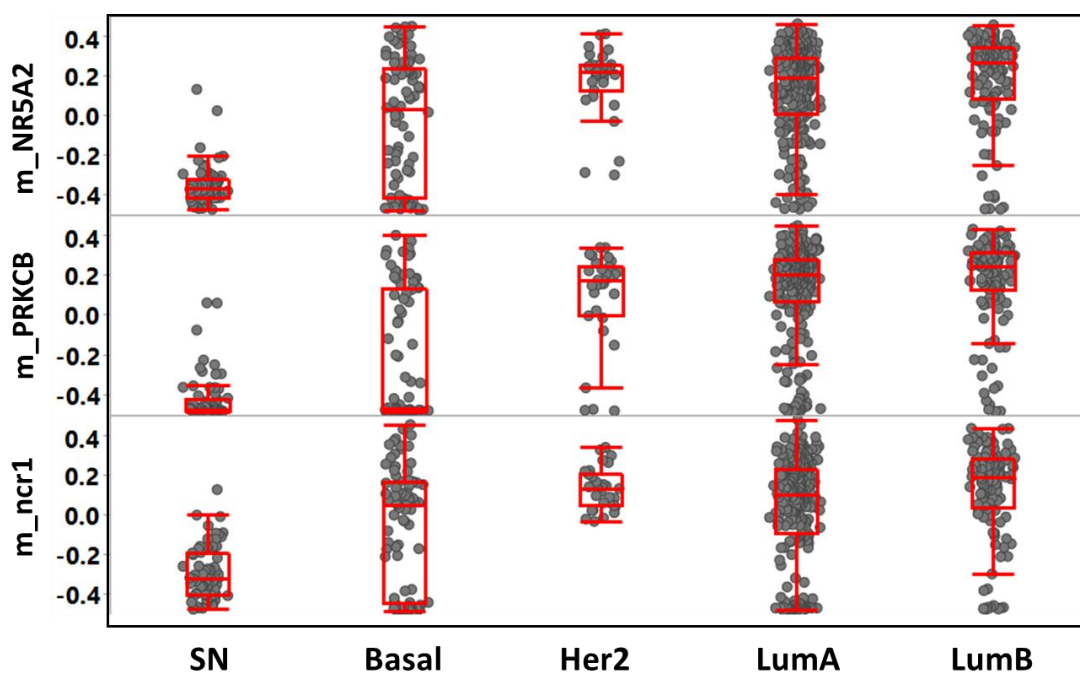

**B.** Comparison of means for *m\_ncr1*

| Level        | Number | Mean     | Std Dev  | Std Err Mean | Lower 95% | Upper 95% |
|--------------|--------|----------|----------|--------------|-----------|-----------|
| Basal        | 84     | -0.05970 | 0.303004 | 0.03306      | -0.1255   | 0.0061    |
| Her2         | 31     | 0.13038  | 0.103001 | 0.01850      | 0.0926    | 0.1682    |
| LumA         | 275    | 0.03160  | 0.263412 | 0.01588      | 0.00033   | 0.0629    |
| LumB         | 125    | 0.12785  | 0.235750 | 0.02109      | 0.0861    | 0.1696    |
| Solid Normal | 69     | -0.29641 | 0.134018 | 0.01613      | -0.3286   | -0.2642   |

### Ordered Differences Report

| Level | - Level      | Difference | Std Err Dif | Lower CL  | Upper CL  | p-Value |
|-------|--------------|------------|-------------|-----------|-----------|---------|
| Her2  | Solid Normal | 0.4267951  | 0.0532087   | 0.322290  | 0.5313007 | <.0001* |
| LumB  | Solid Normal | 0.4242633  | 0.0369070   | 0.351775  | 0.4967513 | <.0001* |
| LumA  | Solid Normal | 0.3280156  | 0.0331342   | 0.262938  | 0.3930934 | <.0001* |
| Basal | Solid Normal | 0.2367145  | 0.0399825   | 0.158186  | 0.3152428 | <.0001* |
| Her2  | Basal        | 0.1900806  | 0.0517150   | 0.088509  | 0.2916525 | 0.0003* |
| LumB  | Basal        | 0.1875488  | 0.0347189   | 0.119358  | 0.2557392 | <.0001* |
| Her2  | LumA         | 0.0987796  | 0.0466231   | 0.007208  | 0.1903506 | 0.0345* |
| LumB  | LumA         | 0.0962477  | 0.0265458   | 0.044110  | 0.1483856 | 0.0003* |
| LumA  | Basal        | 0.0913011  | 0.0306782   | 0.031047  | 0.1515551 | 0.0030* |
| Her2  | LumB         | 0.0025318  | 0.0493758   | -0.094446 | 0.0995094 | 0.9591  |

### C. Comparison of means for m\_NR5A2

| Level        | Number | Mean     | Std Dev  | Std Err | Lower 95% Mean | Upper 95% Mean |
|--------------|--------|----------|----------|---------|----------------|----------------|
| Basal        | 84     | -0.03335 | 0.318156 | 0.03471 | -0.1024        | 0.0357         |
| Her2         | 31     | 0.17084  | 0.175765 | 0.03157 | 0.1064         | 0.2353         |
| LumA         | 275    | 0.12894  | 0.222703 | 0.01343 | 0.1025         | 0.1554         |
| LumB         | 125    | 0.18730  | 0.219275 | 0.01961 | 0.1485         | 0.2261         |
| Solid Normal | 69     | -0.35233 | 0.100427 | 0.01209 | -0.3765        | -0.3282        |

### Ordered Differences Report

| Level | - Level      | Difference | Std Err Dif | Lower CL  | Upper CL  | p-Value |
|-------|--------------|------------|-------------|-----------|-----------|---------|
| LumB  | Solid Normal | 0.5396298  | 0.0338903   | 0.473067  | 0.6061928 | <.0001* |
| Her2  | Solid Normal | 0.5231645  | 0.0488595   | 0.427201  | 0.6191280 | <.0001* |
| LumA  | Solid Normal | 0.4812650  | 0.0304259   | 0.421506  | 0.5410235 | <.0001* |
| Basal | Solid Normal | 0.3189790  | 0.0367144   | 0.246869  | 0.3910886 | <.0001* |
| LumB  | Basal        | 0.2206508  | 0.0318811   | 0.158034  | 0.2832675 | <.0001* |
| Her2  | Basal        | 0.2041855  | 0.0474879   | 0.110916  | 0.2974550 | <.0001* |
| LumA  | Basal        | 0.1622860  | 0.0281706   | 0.106957  | 0.2176150 | <.0001* |
| LumB  | LumA         | 0.0583648  | 0.0243760   | 0.010489  | 0.1062411 | 0.0170* |
| Her2  | LumA         | 0.0418995  | 0.0428123   | -0.042187 | 0.1259857 | 0.3281  |
| LumB  | Her2         | 0.0164653  | 0.0453400   | -0.072586 | 0.1055161 | 0.7166  |

### D. Comparison of means for m\_PRKCB

| Level        | Number | Mean     | Std Dev  | Std Err | Lower 95% Mean | Upper 95% Mean |
|--------------|--------|----------|----------|---------|----------------|----------------|
| Basal        | 84     | -0.22185 | 0.319651 | 0.03488 | -0.2912        | -0.1525        |
| Her2         | 31     | 0.08782  | 0.241130 | 0.04331 | -0.0006        | 0.1763         |
| LumA         | 275    | 0.12627  | 0.234603 | 0.01415 | 0.0984         | 0.1541         |
| LumB         | 125    | 0.17095  | 0.216626 | 0.01938 | 0.1326         | 0.2093         |
| Solid Normal | 69     | -0.42430 | 0.114567 | 0.01379 | -0.4518        | -0.3968        |

### Ordered Differences Report

| Level | - Level      | Difference | Std Err Dif | Lower CL  | Upper CL  | p-Value |
|-------|--------------|------------|-------------|-----------|-----------|---------|
| LumB  | Solid Normal | 0.5952450  | 0.0352673   | 0.525977  | 0.6645125 | <.0001* |
| LumA  | Solid Normal | 0.5505655  | 0.0316621   | 0.488379  | 0.6127520 | <.0001* |
| Her2  | Solid Normal | 0.5121179  | 0.0508447   | 0.412255  | 0.6119805 | <.0001* |
| LumB  | Basal        | 0.3927928  | 0.0331765   | 0.327632  | 0.4579537 | <.0001* |
| LumA  | Basal        | 0.3481133  | 0.0293152   | 0.290536  | 0.4056904 | <.0001* |
| Her2  | Basal        | 0.3096658  | 0.0494174   | 0.212607  | 0.4067250 | <.0001* |
| Basal | Solid Normal | 0.2024521  | 0.0382061   | 0.127413  | 0.2774916 | <.0001* |
| LumB  | Her2         | 0.0831270  | 0.0471822   | -0.009542 | 0.1757961 | 0.0786  |
| LumB  | LumA         | 0.0446795  | 0.0253665   | -0.005142 | 0.0945010 | 0.0787  |
| LumA  | Her2         | 0.0384476  | 0.0445518   | -0.049055 | 0.1259503 | 0.3885  |

**Supplement 7 (Figures and Tables).** Relationship between CpG methylation and patient age.

**A. m\_NR5A2 v. Age of Diagnosis**

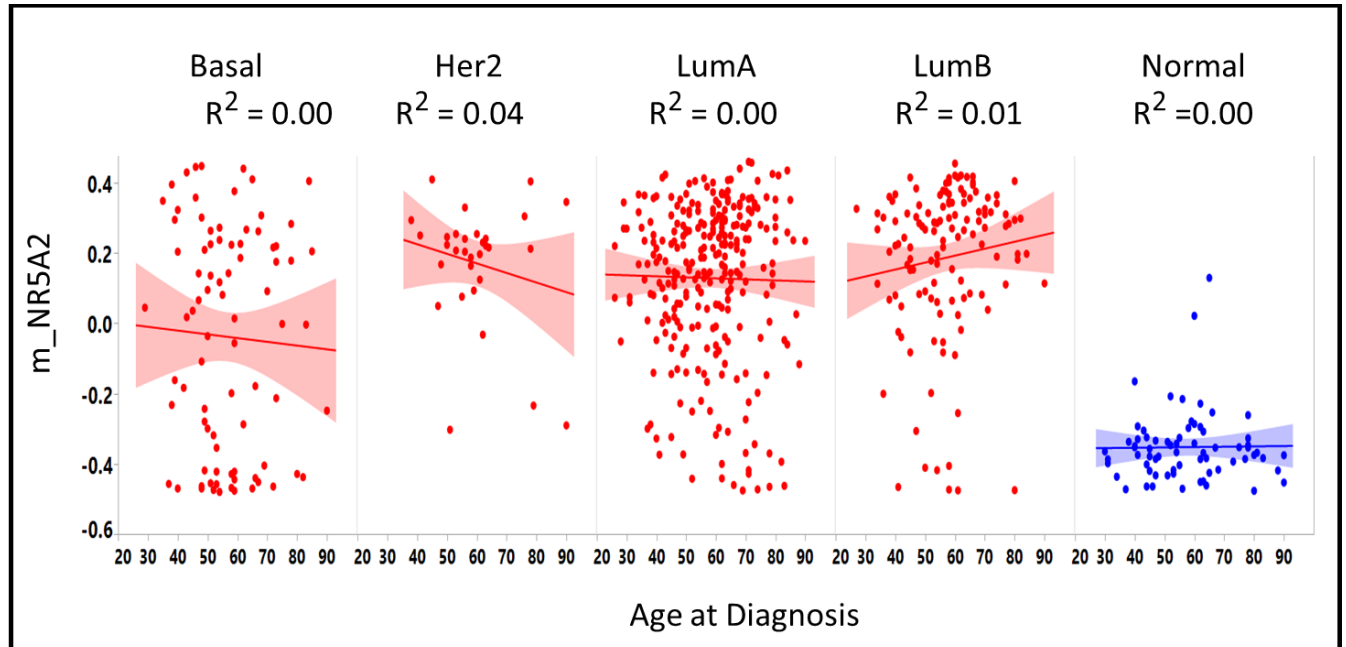

*Bivariate analyses for m\_NR5A2 v. Age of Diagnosis for every molecular subtype of breast cancer*

**1. Basal**

**Linear Fit**

$$m\_NR5A2 = 0.0224009 - 0.0010693 * \text{Age}$$

**Summary of Fit**

|                            |          |
|----------------------------|----------|
| RSquare                    | 0.001961 |
| RSquare Adj                | -0.01036 |
| Root Mean Square Error     | 0.318466 |
| Mean of Response           | -0.03829 |
| Observations (or Sum Wgts) | 83       |

**Analysis of Variance**

| Source   | DF | Sum of Squares | Mean Square | F Ratio            |
|----------|----|----------------|-------------|--------------------|
| Model    | 1  | 0.0161446      | 0.016145    | 0.1592             |
| Error    | 81 | 8.2150447      | 0.101420    | <b>Prob &gt; F</b> |
| C. Total | 82 | 8.2311893      |             | 0.6910             |

### Parameter Estimates

| Term      | Estimate  | Std Error | t Ratio | Prob> t |
|-----------|-----------|-----------|---------|---------|
| Intercept | 0.0224009 | 0.156087  | 0.14    | 0.8862  |
| Age       | -0.001069 | 0.00268   | -0.40   | 0.6910  |

## 2. Her2

### Linear Fit

$$m\_NR5A2 = 0.3347712 - 0.0027308 * \text{Age}$$

### Summary of Fit

|                            |          |
|----------------------------|----------|
| RSquare                    | 0.039853 |
| RSquare Adj                | 0.006744 |
| Root Mean Square Error     | 0.175171 |
| Mean of Response           | 0.170835 |
| Observations (or Sum Wgts) | 31       |

### Analysis of Variance

| Source   | DF | Sum of Squares | Mean Square | F Ratio            |
|----------|----|----------------|-------------|--------------------|
| Model    | 1  | 0.03693545     | 0.036935    | 1.2037             |
| Error    | 29 | 0.88986060     | 0.030685    | <b>Prob &gt; F</b> |
| C. Total | 30 | 0.92679605     |             | 0.2816             |

### Parameter Estimates

| Term      | Estimate  | Std Error | t Ratio | Prob> t |
|-----------|-----------|-----------|---------|---------|
| Intercept | 0.3347712 | 0.152698  | 2.19    | 0.0365* |
| Age       | -0.002731 | 0.002489  | -1.10   | 0.2816  |

## 3. LumA

### Linear Fit

$$m\_NR5A2 = 0.1458252 - 0.0002915 * \text{Age}$$

### Summary of Fit

|                            |          |
|----------------------------|----------|
| RSquare                    | 0.000311 |
| RSquare Adj                | -0.00335 |
| Root Mean Square Error     | 0.223075 |
| Mean of Response           | 0.128936 |
| Observations (or Sum Wgts) | 275      |



### Analysis of Variance

| Source   | DF  | Sum of Squares | Mean Square | F Ratio            |
|----------|-----|----------------|-------------|--------------------|
| Model    | 1   | 0.004233       | 0.004233    | 0.0851             |
| Error    | 273 | 13.585201      | 0.049763    | <b>Prob &gt; F</b> |
| C. Total | 274 | 13.589433      |             | 0.7708             |

### Parameter Estimates

| Term      | Estimate  | Std Error | t Ratio | Prob> t |
|-----------|-----------|-----------|---------|---------|
| Intercept | 0.1458252 | 0.059453  | 2.45    | 0.0148* |
| Age       | -0.000291 | 0.000999  | -0.29   | 0.7708  |

### 4. LumB

#### Linear Fit

$$m\_NR5A2 = 0.0744462 + 0.001978*Age$$

#### Summary of Fit

|                            |          |
|----------------------------|----------|
| RSquare                    | 0.013055 |
| RSquare Adj                | 0.005031 |
| Root Mean Square Error     | 0.218723 |
| Mean of Response           | 0.187301 |
| Observations (or Sum Wgts) | 125      |

### Analysis of Variance

| Source   | DF  | Sum of Squares | Mean Square | F Ratio            |
|----------|-----|----------------|-------------|--------------------|
| Model    | 1   | 0.0778344      | 0.077834    | 1.6270             |
| Error    | 123 | 5.8842656      | 0.047840    | <b>Prob &gt; F</b> |
| C. Total | 124 | 5.9621000      |             | 0.2045             |

### Parameter Estimates

| Term      | Estimate  | Std Error | t Ratio | Prob> t |
|-----------|-----------|-----------|---------|---------|
| Intercept | 0.0744462 | 0.090613  | 0.82    | 0.4129  |
| Age       | 0.001978  | 0.001551  | 1.28    | 0.2045  |

### 5. Normal

#### Linear Fit

$$m\_NR5A2 = -0.357937 + 0.0000979*Age$$

#### Summary of Fit

|                            |          |
|----------------------------|----------|
| RSquare                    | 0.000221 |
| RSquare Adj                | -0.0147  |
| Root Mean Square Error     | 0.101163 |
| Mean of Response           | -0.35233 |
| Observations (or Sum Wgts) | 69       |

## Analysis of Variance

| Source   | DF | Sum of Squares | Mean Square | F Ratio            |
|----------|----|----------------|-------------|--------------------|
| Model    | 1  | 0.00015122     | 0.000151    | 0.0148             |
| Error    | 67 | 0.68567118     | 0.010234    | <b>Prob &gt; F</b> |
| C. Total | 68 | 0.68582240     |             | 0.9036             |

## Parameter Estimates

| Term      | Estimate  | Std Error | t Ratio | Prob> t |
|-----------|-----------|-----------|---------|---------|
| Intercept | -0.357937 | 0.047717  | -7.50   | <.0001* |
| Age       | 0.0000979 | 0.000805  | 0.12    | 0.9036  |

## B. m\_ncr1

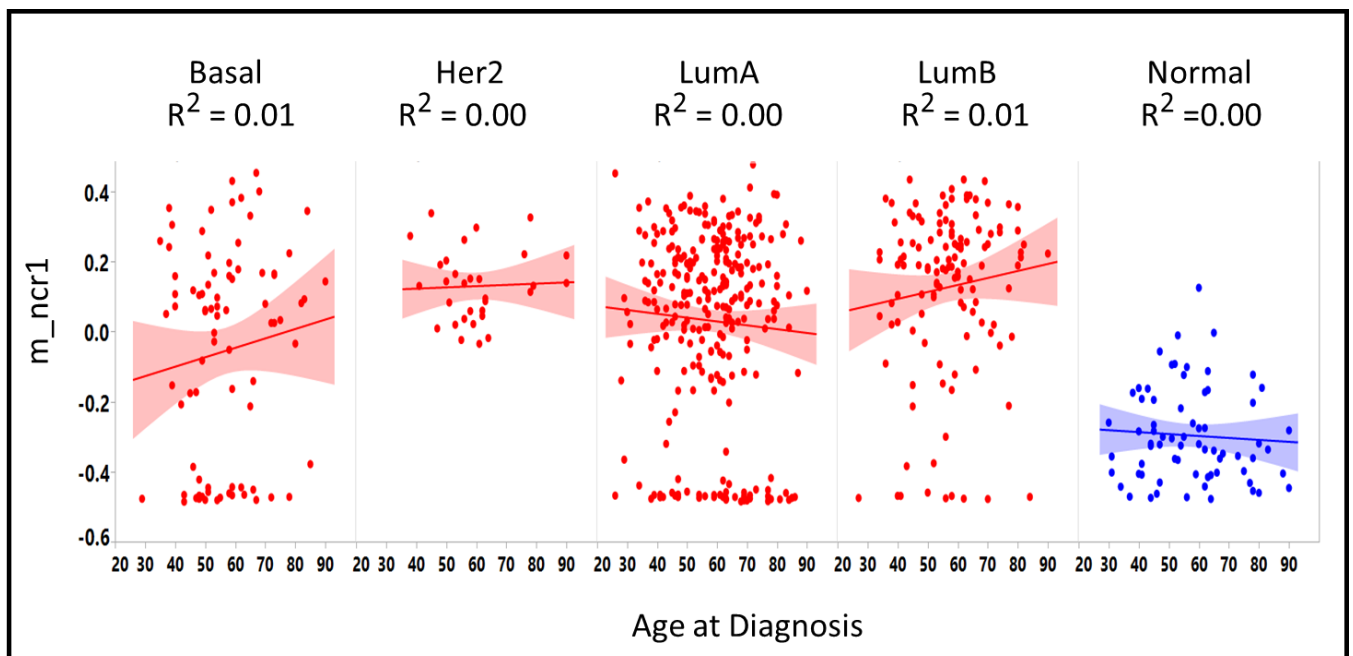

## *Bivariate analyses for m\_ncr1 v. age of diagnosis for every molecular subtype of breast cancer*

### 1. Basal

#### Linear Fit

$$m\_ncr1 = -0.20773 + 0.0026946 * \text{Age}$$

### Summary of Fit

|                            |          |
|----------------------------|----------|
| RSquare                    | 0.013757 |
| RSquare Adj                | 0.001581 |
| Root Mean Square Error     | 0.301223 |
| Mean of Response           | -0.05479 |
| Observations (or Sum Wgts) | 83       |

### Analysis of Variance

| Source   | DF | Sum of Squares | Mean Square | F Ratio            |
|----------|----|----------------|-------------|--------------------|
| Model    | 1  | 0.1025176      | 0.102518    | 1.1299             |
| Error    | 81 | 7.3495446      | 0.090735    | <b>Prob &gt; F</b> |
| C. Total | 82 | 7.4520623      |             | 0.2910             |

### Parameter Estimates

| Term      | Estimate  | Std Error | t Ratio | Prob> t |
|-----------|-----------|-----------|---------|---------|
| Intercept | -0.20773  | 0.147636  | -1.41   | 0.1632  |
| Age       | 0.0026946 | 0.002535  | 1.06    | 0.2910  |

## 2. Her2

### Linear Fit

$$m\_ncr1 = 0.1090932 + 0.0003546 * \text{Age}$$

### Summary of Fit

|                            |          |
|----------------------------|----------|
| RSquare                    | 0.001957 |
| RSquare Adj                | -0.03246 |
| Root Mean Square Error     | 0.104659 |
| Mean of Response           | 0.130381 |
| Observations (or Sum Wgts) | 31       |

### Analysis of Variance

| Source   | DF | Sum of Squares | Mean Square | F Ratio            |
|----------|----|----------------|-------------|--------------------|
| Model    | 1  | 0.00062279     | 0.000623    | 0.0569             |
| Error    | 29 | 0.31765176     | 0.010954    | <b>Prob &gt; F</b> |
| C. Total | 30 | 0.31827455     |             | 0.8132             |

### Parameter Estimates

| Term      | Estimate  | Std Error | t Ratio | Prob> t |
|-----------|-----------|-----------|---------|---------|
| Intercept | 0.1090932 | 0.091232  | 1.20    | 0.2415  |
| Age       | 0.0003546 | 0.001487  | 0.24    | 0.8132  |

## 3. LumA

### Linear Fit

$$m\_ncr1 = 0.0951138 - 0.0010961 * \text{Age}$$

### Summary of Fit

|                            |          |
|----------------------------|----------|
| RSquare                    | 0.003148 |
| RSquare Adj                | -0.0005  |
| Root Mean Square Error     | 0.263479 |
| Mean of Response           | 0.031601 |
| Observations (or Sum Wgts) | 275      |

### Analysis of Variance

| Source   | DF  | Sum of Squares | Mean Square | F Ratio            |
|----------|-----|----------------|-------------|--------------------|
| Model    | 1   | 0.059856       | 0.059856    | 0.8622             |
| Error    | 273 | 18.951919      | 0.069421    | <b>Prob &gt; F</b> |
| C. Total | 274 | 19.011774      |             | 0.3539             |

### Parameter Estimates

| Term      | Estimate  | Std Error | t Ratio | Prob> t |
|-----------|-----------|-----------|---------|---------|
| Intercept | 0.0951138 | 0.070221  | 1.35    | 0.1767  |
| Age       | -0.001096 | 0.00118   | -0.93   | 0.3539  |

## 4. LumB

### Linear Fit

$$m\_ncr1 = 0.0136965 + 0.0020007 * \text{Age}$$

### Summary of Fit

|                            |          |
|----------------------------|----------|
| RSquare                    | 0.011555 |
| RSquare Adj                | 0.003519 |
| Root Mean Square Error     | 0.235335 |
| Mean of Response           | 0.127849 |
| Observations (or Sum Wgts) | 125      |

### Analysis of Variance

| Source   | DF  | Sum of Squares | Mean Square | F Ratio            |
|----------|-----|----------------|-------------|--------------------|
| Model    | 1   | 0.0796346      | 0.079635    | 1.4379             |
| Error    | 123 | 6.8120618      | 0.055383    | <b>Prob &gt; F</b> |
| C. Total | 124 | 6.8916964      |             | 0.2328             |

### Parameter Estimates

| Term      | Estimate  | Std Error | t Ratio | Prob> t |
|-----------|-----------|-----------|---------|---------|
| Intercept | 0.0136965 | 0.097496  | 0.14    | 0.8885  |
| Age       | 0.0020007 | 0.001668  | 1.20    | 0.2328  |

## 5. Normal

### Linear Fit

$$m\_ncr1 = -0.264467 - 0.0005576 * \text{Age}$$

### Summary of Fit

|                            |          |
|----------------------------|----------|
| RSquare                    | 0.004018 |
| RSquare Adj                | -0.01085 |
| Root Mean Square Error     | 0.134742 |
| Mean of Response           | -0.29641 |
| Observations (or Sum Wgts) | 69       |

### Analysis of Variance

| Source   | DF | Sum of Squares | Mean Square | F Ratio            |
|----------|----|----------------|-------------|--------------------|
| Model    | 1  | 0.0049071      | 0.004907    | 0.2703             |
| Error    | 67 | 1.2164201      | 0.018156    | <b>Prob &gt; F</b> |
| C. Total | 68 | 1.2213271      |             | 0.6049             |

### Parameter Estimates

| Term      | Estimate  | Std Error | t Ratio | Prob> t |
|-----------|-----------|-----------|---------|---------|
| Intercept | -0.264467 | 0.063555  | -4.16   | <.0001* |
| Age       | -0.000558 | 0.001073  | -0.52   | 0.6049  |

### C. m\_PRKCB

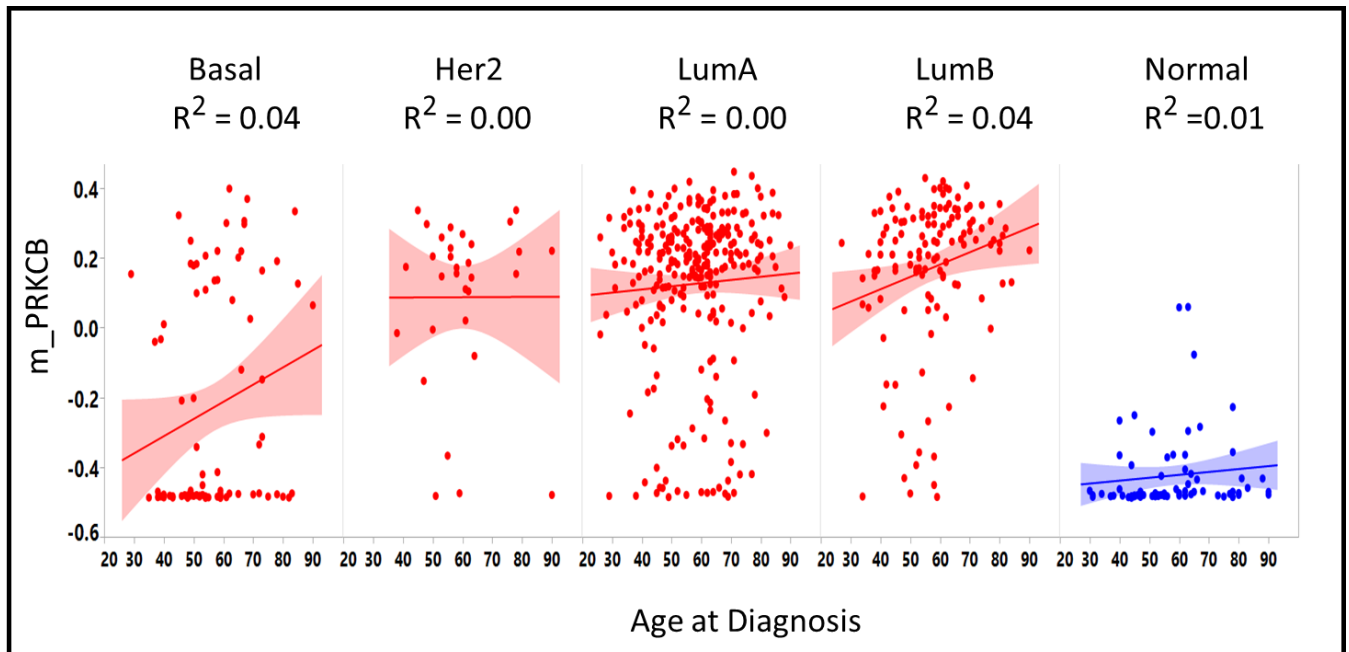

## *Bivariate analyses for m\_PRKCB v. age of diagnosis for every molecular subtype of breast cancer*

### **1. Basal**

#### **Linear Fit**

$$m\_PRKCB = -0.508481 + 0.0049357 * \text{Age}$$

#### **Summary of Fit**

|                            |          |
|----------------------------|----------|
| RSquare                    | 0.042012 |
| RSquare Adj                | 0.030185 |
| Root Mean Square Error     | 0.311175 |
| Mean of Response           | -0.22833 |
| Observations (or Sum Wgts) | 83       |

#### **Analysis of Variance**

| Source   | DF | Sum of Squares | Mean Square | F Ratio            |
|----------|----|----------------|-------------|--------------------|
| Model    | 1  | 0.3439599      | 0.343960    | 3.5522             |
| Error    | 81 | 7.8432045      | 0.096830    | <b>Prob &gt; F</b> |
| C. Total | 82 | 8.1871644      |             | 0.0631             |

#### **Parameter Estimates**

| Term      | Estimate  | Std Error | t Ratio | Prob> t |
|-----------|-----------|-----------|---------|---------|
| Intercept | -0.508481 | 0.152513  | -3.33   | 0.0013* |
| Age       | 0.0049357 | 0.002619  | 1.88    | 0.0631  |

### **2. HER2**

#### **Linear Fit**

$$m\_PRKCB = 0.0852113 + 4.3445e-5 * \text{Age}$$

#### **Summary of Fit**

|                            |          |
|----------------------------|----------|
| RSquare                    | 5.359e-6 |
| RSquare Adj                | -0.03448 |
| Root Mean Square Error     | 0.245251 |
| Mean of Response           | 0.087819 |
| Observations (or Sum Wgts) | 31       |

#### **Analysis of Variance**

| Source   | DF | Sum of Squares | Mean Square | F Ratio            |
|----------|----|----------------|-------------|--------------------|
| Model    | 1  | 0.0000093      | 9.348e-6    | 0.0002             |
| Error    | 29 | 1.7442988      | 0.060148    | <b>Prob &gt; F</b> |
| C. Total | 30 | 1.7443081      |             | 0.9901             |

#### **Parameter Estimates**

| Term      | Estimate  | Std Error | t Ratio | Prob> t |
|-----------|-----------|-----------|---------|---------|
| Intercept | 0.0852113 | 0.213788  | 0.40    | 0.6931  |
| Age       | 4.3445e-5 | 0.003485  | 0.01    | 0.9901  |

### 3. LumA

#### Linear Fit

$$m\_PRKCB = 0.073532 + 0.0009101 * \text{Age}$$

#### Summary of Fit

|                            |          |
|----------------------------|----------|
| RSquare                    | 0.002736 |
| RSquare Adj                | -0.00092 |
| Root Mean Square Error     | 0.234711 |
| Mean of Response           | 0.126267 |
| Observations (or Sum Wgts) | 275      |

#### Analysis of Variance

| Source   | DF  | Sum of Squares | Mean Square | F Ratio            |
|----------|-----|----------------|-------------|--------------------|
| Model    | 1   | 0.041265       | 0.041265    | 0.7491             |
| Error    | 273 | 15.039324      | 0.055089    | <b>Prob &gt; F</b> |
| C. Total | 274 | 15.080589      |             | 0.3875             |

#### Parameter Estimates

| Term      | Estimate  | Std Error | t Ratio | Prob> t |
|-----------|-----------|-----------|---------|---------|
| Intercept | 0.073532  | 0.062554  | 1.18    | 0.2408  |
| Age       | 0.0009101 | 0.001052  | 0.87    | 0.3875  |

### 4. LumB

#### Linear Fit

$$m\_PRKCB = -0.031157 + 0.0035422 * \text{Age}$$

#### Summary of Fit

|                            |          |
|----------------------------|----------|
| RSquare                    | 0.042898 |
| RSquare Adj                | 0.035117 |
| Root Mean Square Error     | 0.212789 |
| Mean of Response           | 0.170946 |
| Observations (or Sum Wgts) | 125      |

#### Analysis of Variance

| Source   | DF  | Sum of Squares | Mean Square | F Ratio            |
|----------|-----|----------------|-------------|--------------------|
| Model    | 1   | 0.2496212      | 0.249621    | 5.5130             |
| Error    | 123 | 5.5693221      | 0.045279    | <b>Prob &gt; F</b> |
| C. Total | 124 | 5.8189433      |             | 0.0205*            |

#### Parameter Estimates

| Term      | Estimate  | Std Error | t Ratio | Prob> t |
|-----------|-----------|-----------|---------|---------|
| Intercept | -0.031157 | 0.088155  | -0.35   | 0.7244  |
| Age       | 0.0035422 | 0.001509  | 2.35    | 0.0205* |

### 5. Normal

#### Linear Fit

$$m\_PRKCB = -0.471957 + 0.0008319 * \text{Age}$$

#### Summary of Fit

|                            |          |
|----------------------------|----------|
| RSquare                    | 0.012235 |
| RSquare Adj                | -0.00251 |
| Root Mean Square Error     | 0.11471  |
| Mean of Response           | -0.4243  |
| Observations (or Sum Wgts) | 69       |

#### Analysis of Variance

| Source   | DF | Sum of Squares | Mean Square | F Ratio            |
|----------|----|----------------|-------------|--------------------|
| Model    | 1  | 0.01092034     | 0.010920    | 0.8299             |
| Error    | 67 | 0.88161585     | 0.013158    | <b>Prob &gt; F</b> |
| C. Total | 68 | 0.89253619     |             | 0.3656             |

#### Parameter Estimates

| Term      | Estimate  | Std Error | t Ratio | Prob> t |
|-----------|-----------|-----------|---------|---------|
| Intercept | -0.471957 | 0.054107  | -8.72   | <.0001* |
| Age       | 0.0008319 | 0.000913  | 0.91    | 0.3656  |



**Supplement 8 (Figure and Tables).** Relationship between CpG methylation and patient race

**Part A.** Comparative level of methylation ( $\beta$  value) at m\_ncr1, m\_PRKCB, and m\_NR5A2 in normal both normal and primary tumor breast tissues, among 3 races. The  $\beta$  values range from -0.5 (0% methylation) to +0.5 (100% methylation).

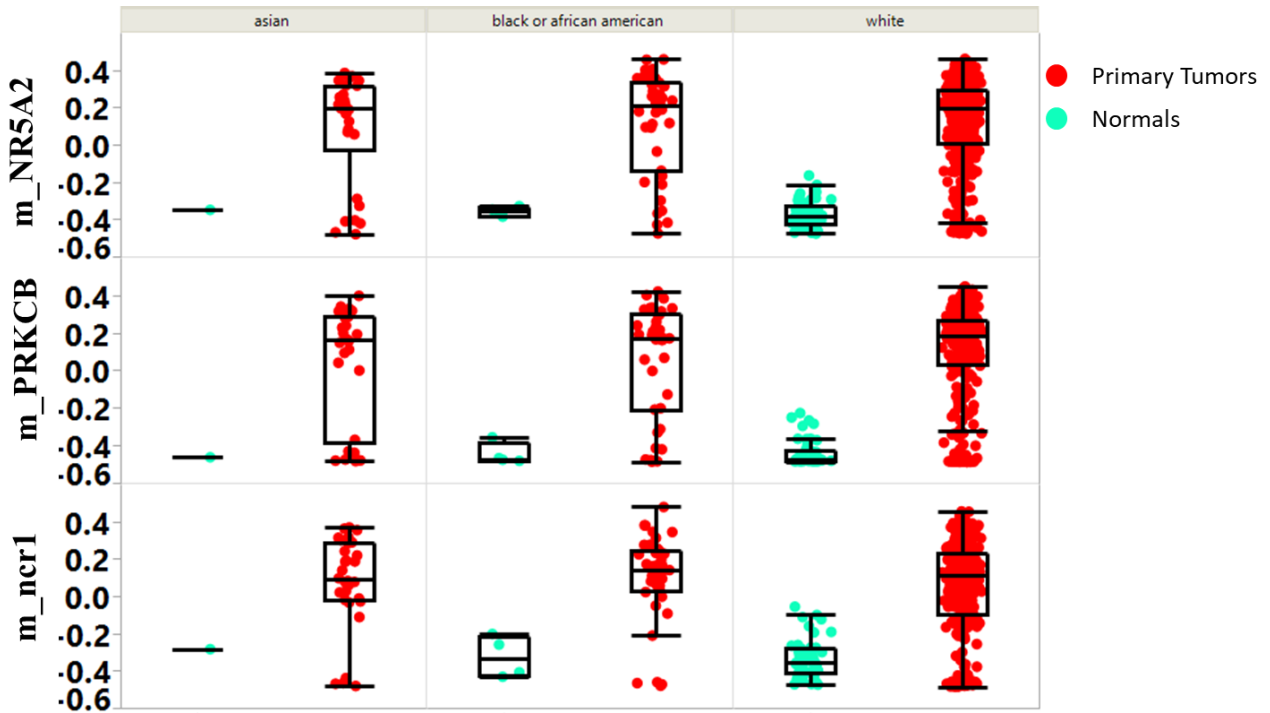

**Part B.** Comparison of means for m\_ncr1

| Ordered Differences Report |         |            |             |           |           |         |
|----------------------------|---------|------------|-------------|-----------|-----------|---------|
| Level                      | - Level | Difference | Std Err Dif | Lower CL  | Upper CL  | p-Value |
| black or african american  | white   | 0.0586910  | 0.0441624   | -0.028100 | 0.1454817 | 0.1845  |
| asian                      | white   | 0.0332169  | 0.0498131   | -0.064679 | 0.1311126 | 0.5052  |
| black or african american  | asian   | 0.0254741  | 0.0638057   | -0.099921 | 0.1508691 | 0.6899  |

**Part C.** Comparison of means for m\_NR5A2

**Ordered Differences Report**

| Level                     | - Level                   | Difference | Std Err Dif | Lower CL  | Upper CL  | p-Value |
|---------------------------|---------------------------|------------|-------------|-----------|-----------|---------|
| white                     | asian                     | 0.0330464  | 0.0469324   | -0.059188 | 0.1252810 | 0.4817  |
| black or african american | asian                     | 0.0258269  | 0.0601160   | -0.092317 | 0.1439705 | 0.6677  |
| white                     | black or african american | 0.0072195  | 0.0416086   | -0.074552 | 0.0889912 | 0.8623  |

**Part D. Comparison of means for m\_PRKCB**

**Ordered Differences Report**

| Level                     | - Level                   | Difference | Std Err Dif | Lower CL  | Upper CL  | p-Value |
|---------------------------|---------------------------|------------|-------------|-----------|-----------|---------|
| white                     | asian                     | 0.0490740  | 0.0518659   | -0.052856 | 0.1510042 | 0.3446  |
| white                     | black or african american | 0.0396979  | 0.0459824   | -0.050670 | 0.1300654 | 0.3884  |
| black or african american | asian                     | 0.0093762  | 0.0664353   | -0.121187 | 0.1399389 | 0.8878  |

**Supplement 9 (Tables with Figures).** Relationship between CpG methylation and patient ethnicity .

**Part A.** Comparison of means for m\_ncr1

| Level                  | Number | Mean     | Std Dev  | Std Err Mean | Lower 95% | Upper 95% |
|------------------------|--------|----------|----------|--------------|-----------|-----------|
| hispanic or latino     | 25     | -0.07489 | 0.311554 | 0.06231      | -0.2035   | 0.05372   |
| not hispanic or latino | 431    | 0.05029  | 0.258432 | 0.01245      | 0.0258    | 0.07476   |

**t Test**

not hispanic or latino-hispanic or latino

Assuming unequal variances

|              |          |           |          |
|--------------|----------|-----------|----------|
| Difference   | 0.12518  | t Ratio   | 1.970058 |
| Std Err Dif  | 0.06354  | DF        | 25.95164 |
| Upper CL Dif | 0.25581  | Prob >  t | 0.0596   |
| Lower CL Dif | -0.00544 | Prob > t  | 0.0298*  |
| Confidence   | 0.95     | Prob < t  | 0.9702   |

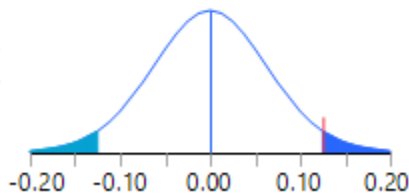

**Part B.** Comparison of means for m\_NR5A2

| Level                  | Number | Mean     | Std Dev  | Std Err Mean | Lower 95% | Upper 95% |
|------------------------|--------|----------|----------|--------------|-----------|-----------|
| hispanic or latino     | 25     | 0.127324 | 0.222628 | 0.04453      | 0.03543   | 0.21922   |
| not hispanic or latino | 431    | 0.119109 | 0.247983 | 0.01194      | 0.09563   | 0.14259   |

**t Test**

not hispanic or latino-hispanic or latino

Assuming unequal variances

|              |          |           |          |
|--------------|----------|-----------|----------|
| Difference   | -0.00821 | t Ratio   | -0.1782  |
| Std Err Dif  | 0.04610  | DF        | 27.57088 |
| Upper CL Dif | 0.08628  | Prob >  t | 0.8599   |
| Lower CL Dif | -0.10271 | Prob > t  | 0.5701   |
| Confidence   | 0.95     | Prob < t  | 0.4299   |

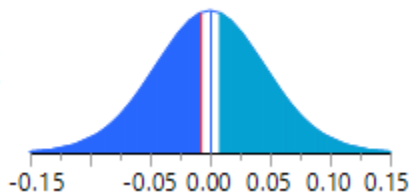

**Part C.** Comparison of means for m\_PRKCB

| Level              | Number | Mean     | Std Dev  | Std Err Mean | Lower 95% | Upper 95% |
|--------------------|--------|----------|----------|--------------|-----------|-----------|
| hispanic or latino | 25     | 0.037644 | 0.321016 | 0.06420      | -0.0949   | 0.17015   |

| Level                  | Number | Mean     | Std Dev  | Std Err Mean | Lower 95% | Upper 95% |
|------------------------|--------|----------|----------|--------------|-----------|-----------|
| not hispanic or latino | 431    | 0.086284 | 0.270516 | 0.01303      | 0.0607    | 0.11189   |

### t Test

not hispanic or latino-hispanic or latino

Assuming unequal variances

|              |          |           |          |
|--------------|----------|-----------|----------|
| Difference   | 0.04864  | t Ratio   | 0.742453 |
| Std Err Dif  | 0.06551  | DF        | 26.01539 |
| Upper CL Dif | 0.18330  | Prob >  t | 0.4645   |
| Lower CL Dif | -0.08602 | Prob > t  | 0.2322   |
| Confidence   | 0.95     | Prob < t  | 0.7678   |

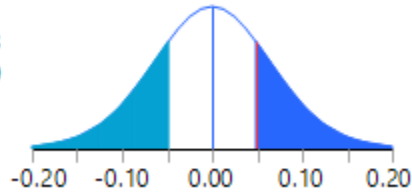

**Supplement 10 (Figure).** Relationship between CpG methylation and gene expression

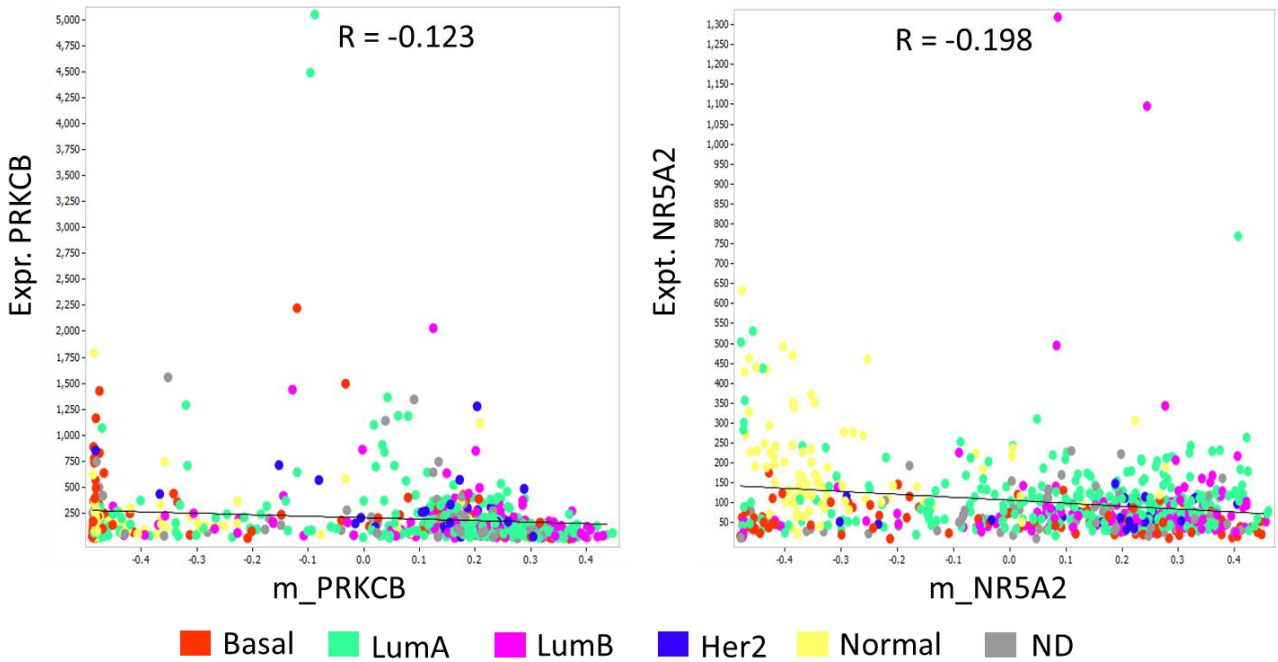

**Linear Fit**

$$\text{Exp\_NR5A2} = 6.3189526 - 0.7178041 * m\_NR5A2$$

**Summary of Fit**

RSquare 0.03604  
 RSquare Adj 0.034624  
 Root Mean Square Error 1.037971  
 Mean of Response 6.280387  
 Observations (or Sum Wgts) 683

**Analysis of Variance**

| Source   | DF  | Sum of Squares | Mean Square | F Ratio            |
|----------|-----|----------------|-------------|--------------------|
| Model    | 1   | 27.43110       | 27.4311     | 25.4608            |
| Error    | 681 | 733.69864      | 1.0774      | <b>Prob &gt; F</b> |
| C. Total | 682 | 761.12973      |             | <.0001*            |

**Parameter Estimates**

| Term      | Estimate  | Std Error | t Ratio | Prob> t |
|-----------|-----------|-----------|---------|---------|
| Intercept | 6.3189526 | 0.040446  | 156.23  | <.0001* |
| m_NR5A2   | -0.717804 | 0.142256  | -5.05   | <.0001* |

**Linear Fit**

Exp\_PRKCB = 6.8118407 - 0.9594483\*m\_PRKCB

**Summary of Fit**

RSquare 0.039227  
RSquare Adj 0.037816  
Root Mean Square Error 1.485149  
Mean of Response 6.806752  
Observations (or Sum Wgts) 683

**Analysis of Variance**

| Source   | DF  | Sum of Squares | Mean Square | F Ratio            |
|----------|-----|----------------|-------------|--------------------|
| Model    | 1   | 61.3269        | 61.3269     | 27.8042            |
| Error    | 681 | 1502.0603      | 2.2057      | <b>Prob &gt; F</b> |
| C. Total | 682 | 1563.3872      |             | <.0001*            |

**Parameter Estimates**

| Term      | Estimate  | Std Error | t Ratio | Prob> t |
|-----------|-----------|-----------|---------|---------|
| Intercept | 6.8118407 | 0.056836  | 119.85  | <.0001* |
| m_PRKCB   | -0.959448 | 0.181956  | -5.27   | <.0001* |
